# Supplementary figures and images for: Consistent Alterations of Human Fecal Microbes After Transplantation into Germ-free Mice
Source: PubMed Central journal article supplement — Genomics Proteomics Bioinformatics. 2021 Jun 9;20(2):382–93. doi: 10.1016/j.gpb.2020.06.024 (PMC9684084; doi:10.1016/j.gpb.2020.06.024), 2021-06-09

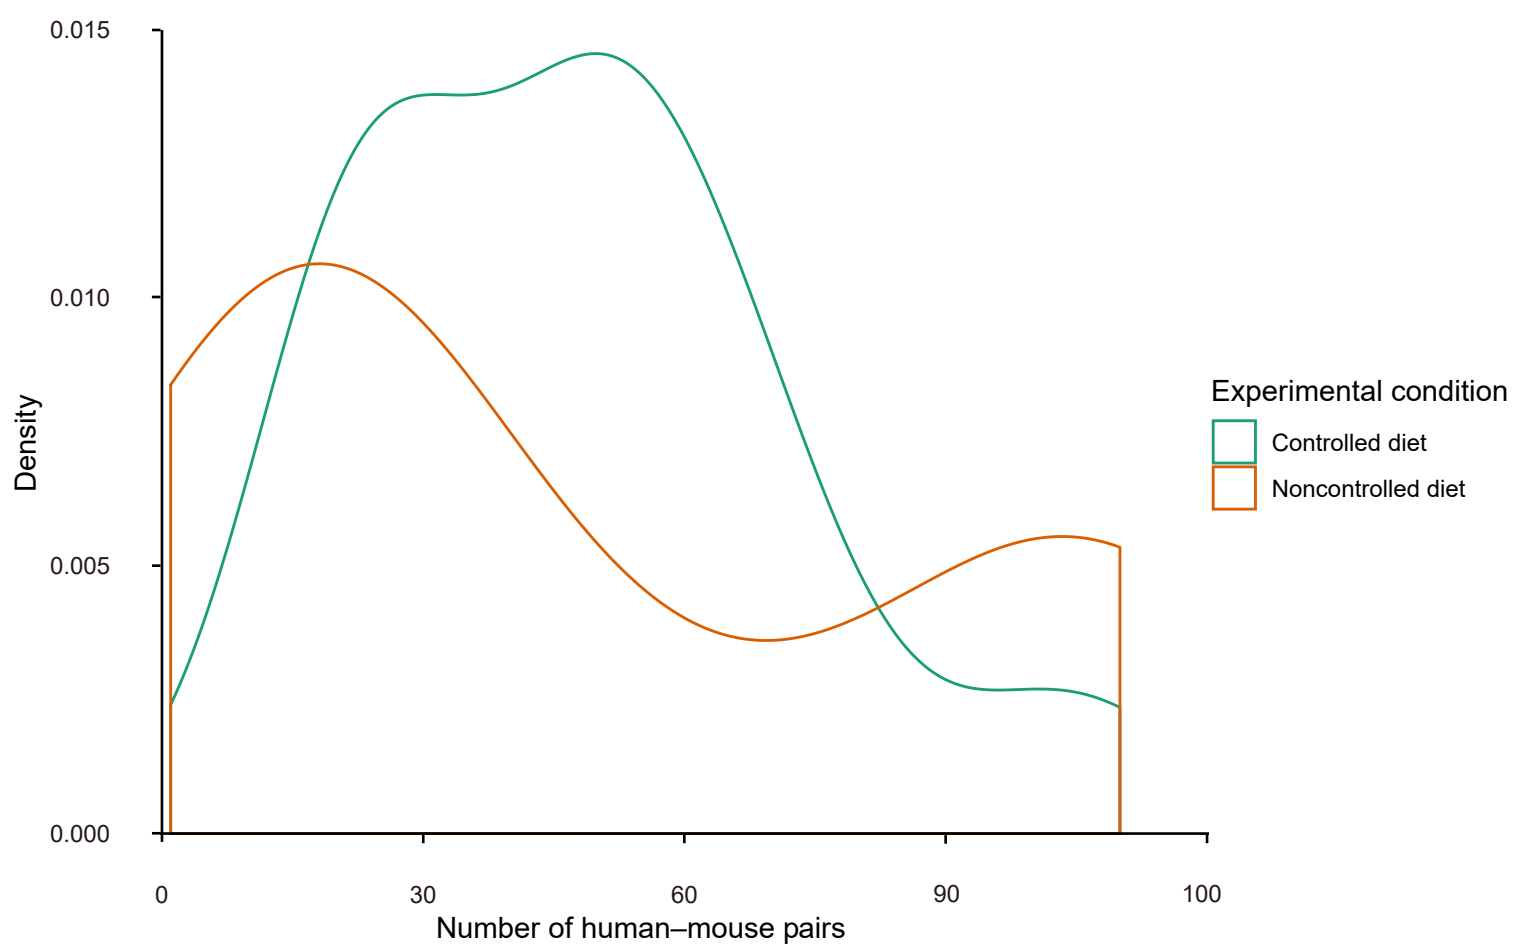

Supplement: mmc10.pdf [file mmc10.pdf]

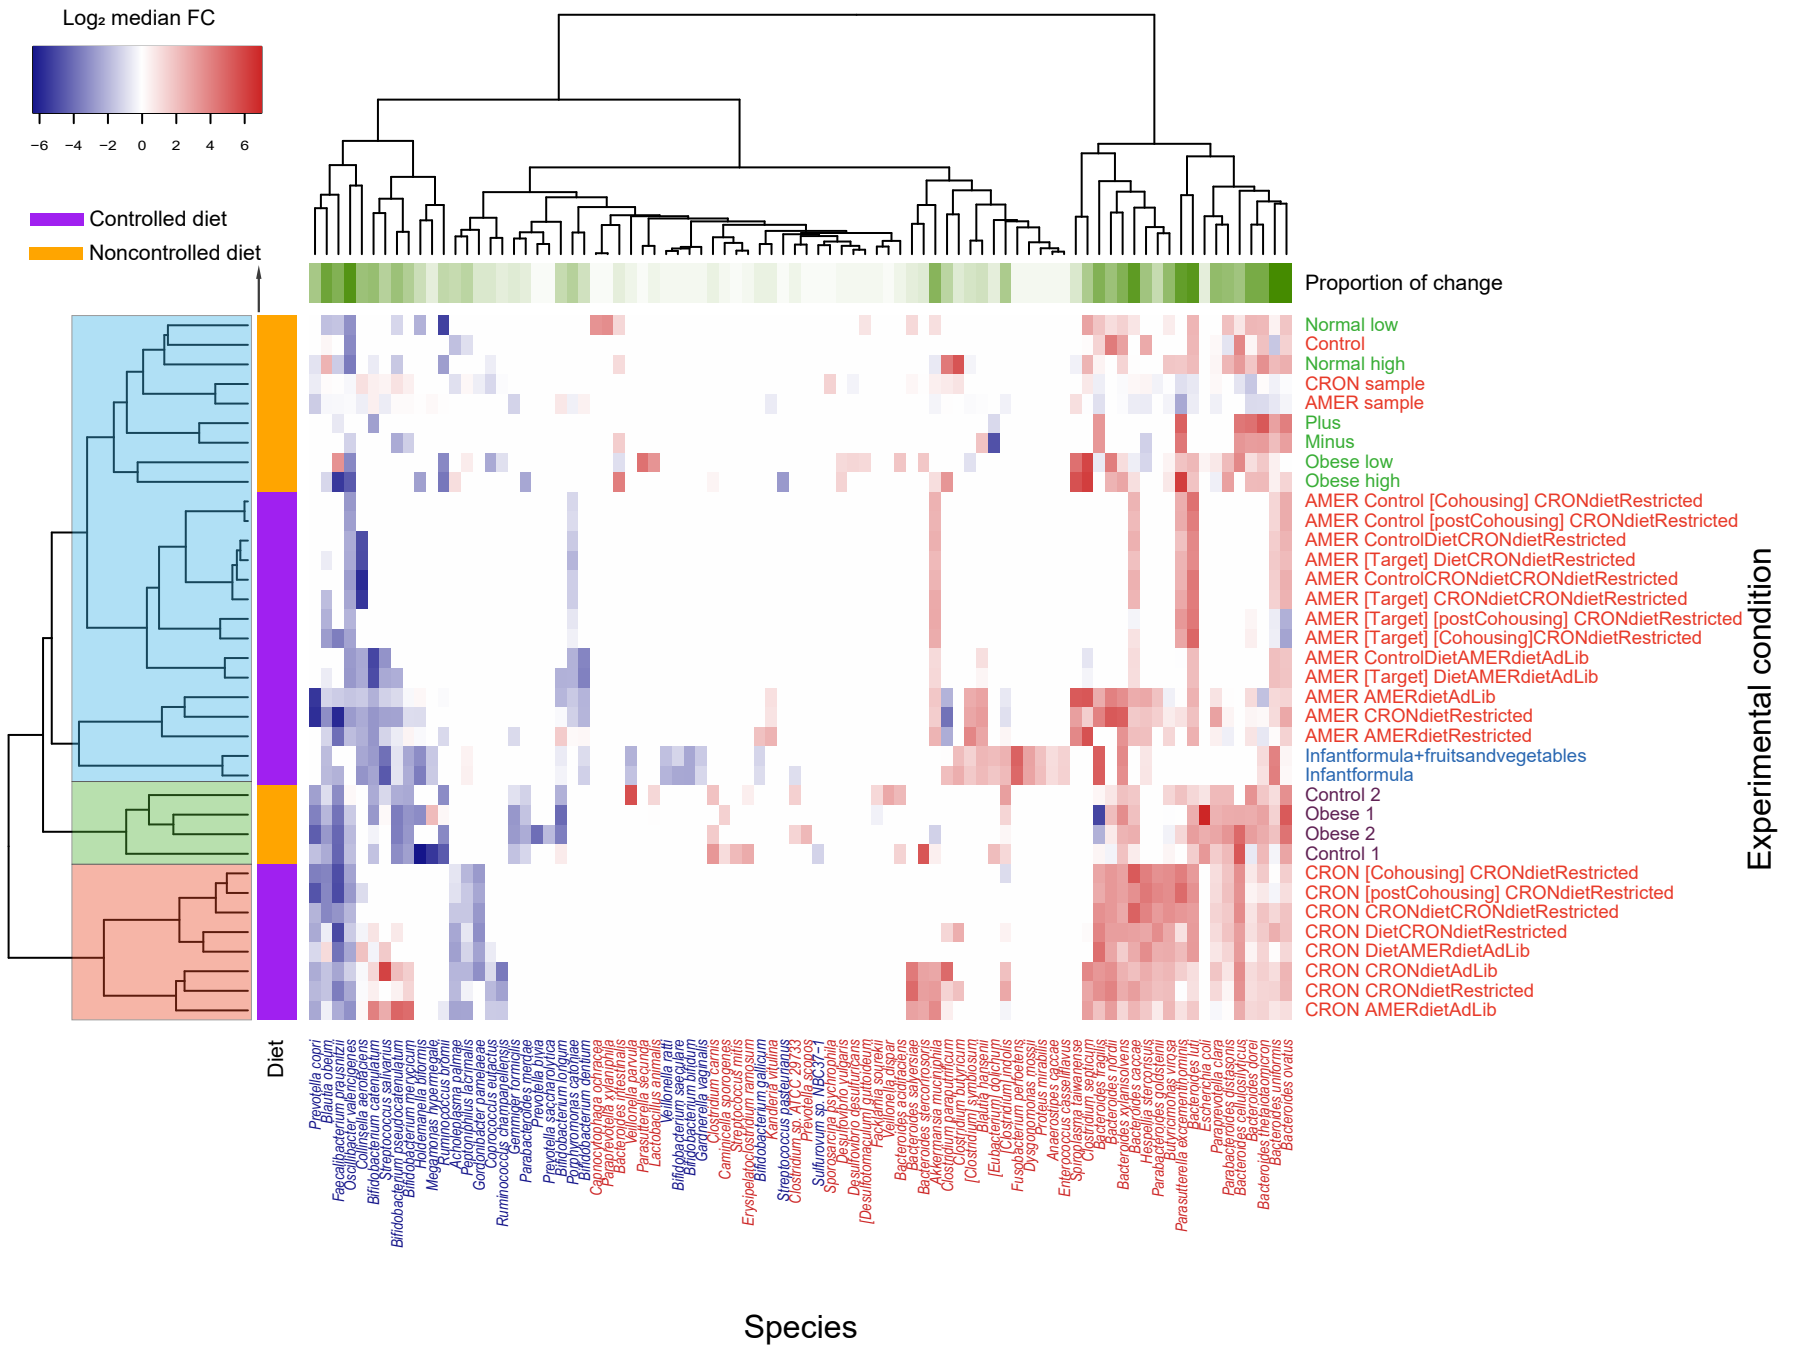

Supplement: mmc2.pdf [file mmc2.pdf]

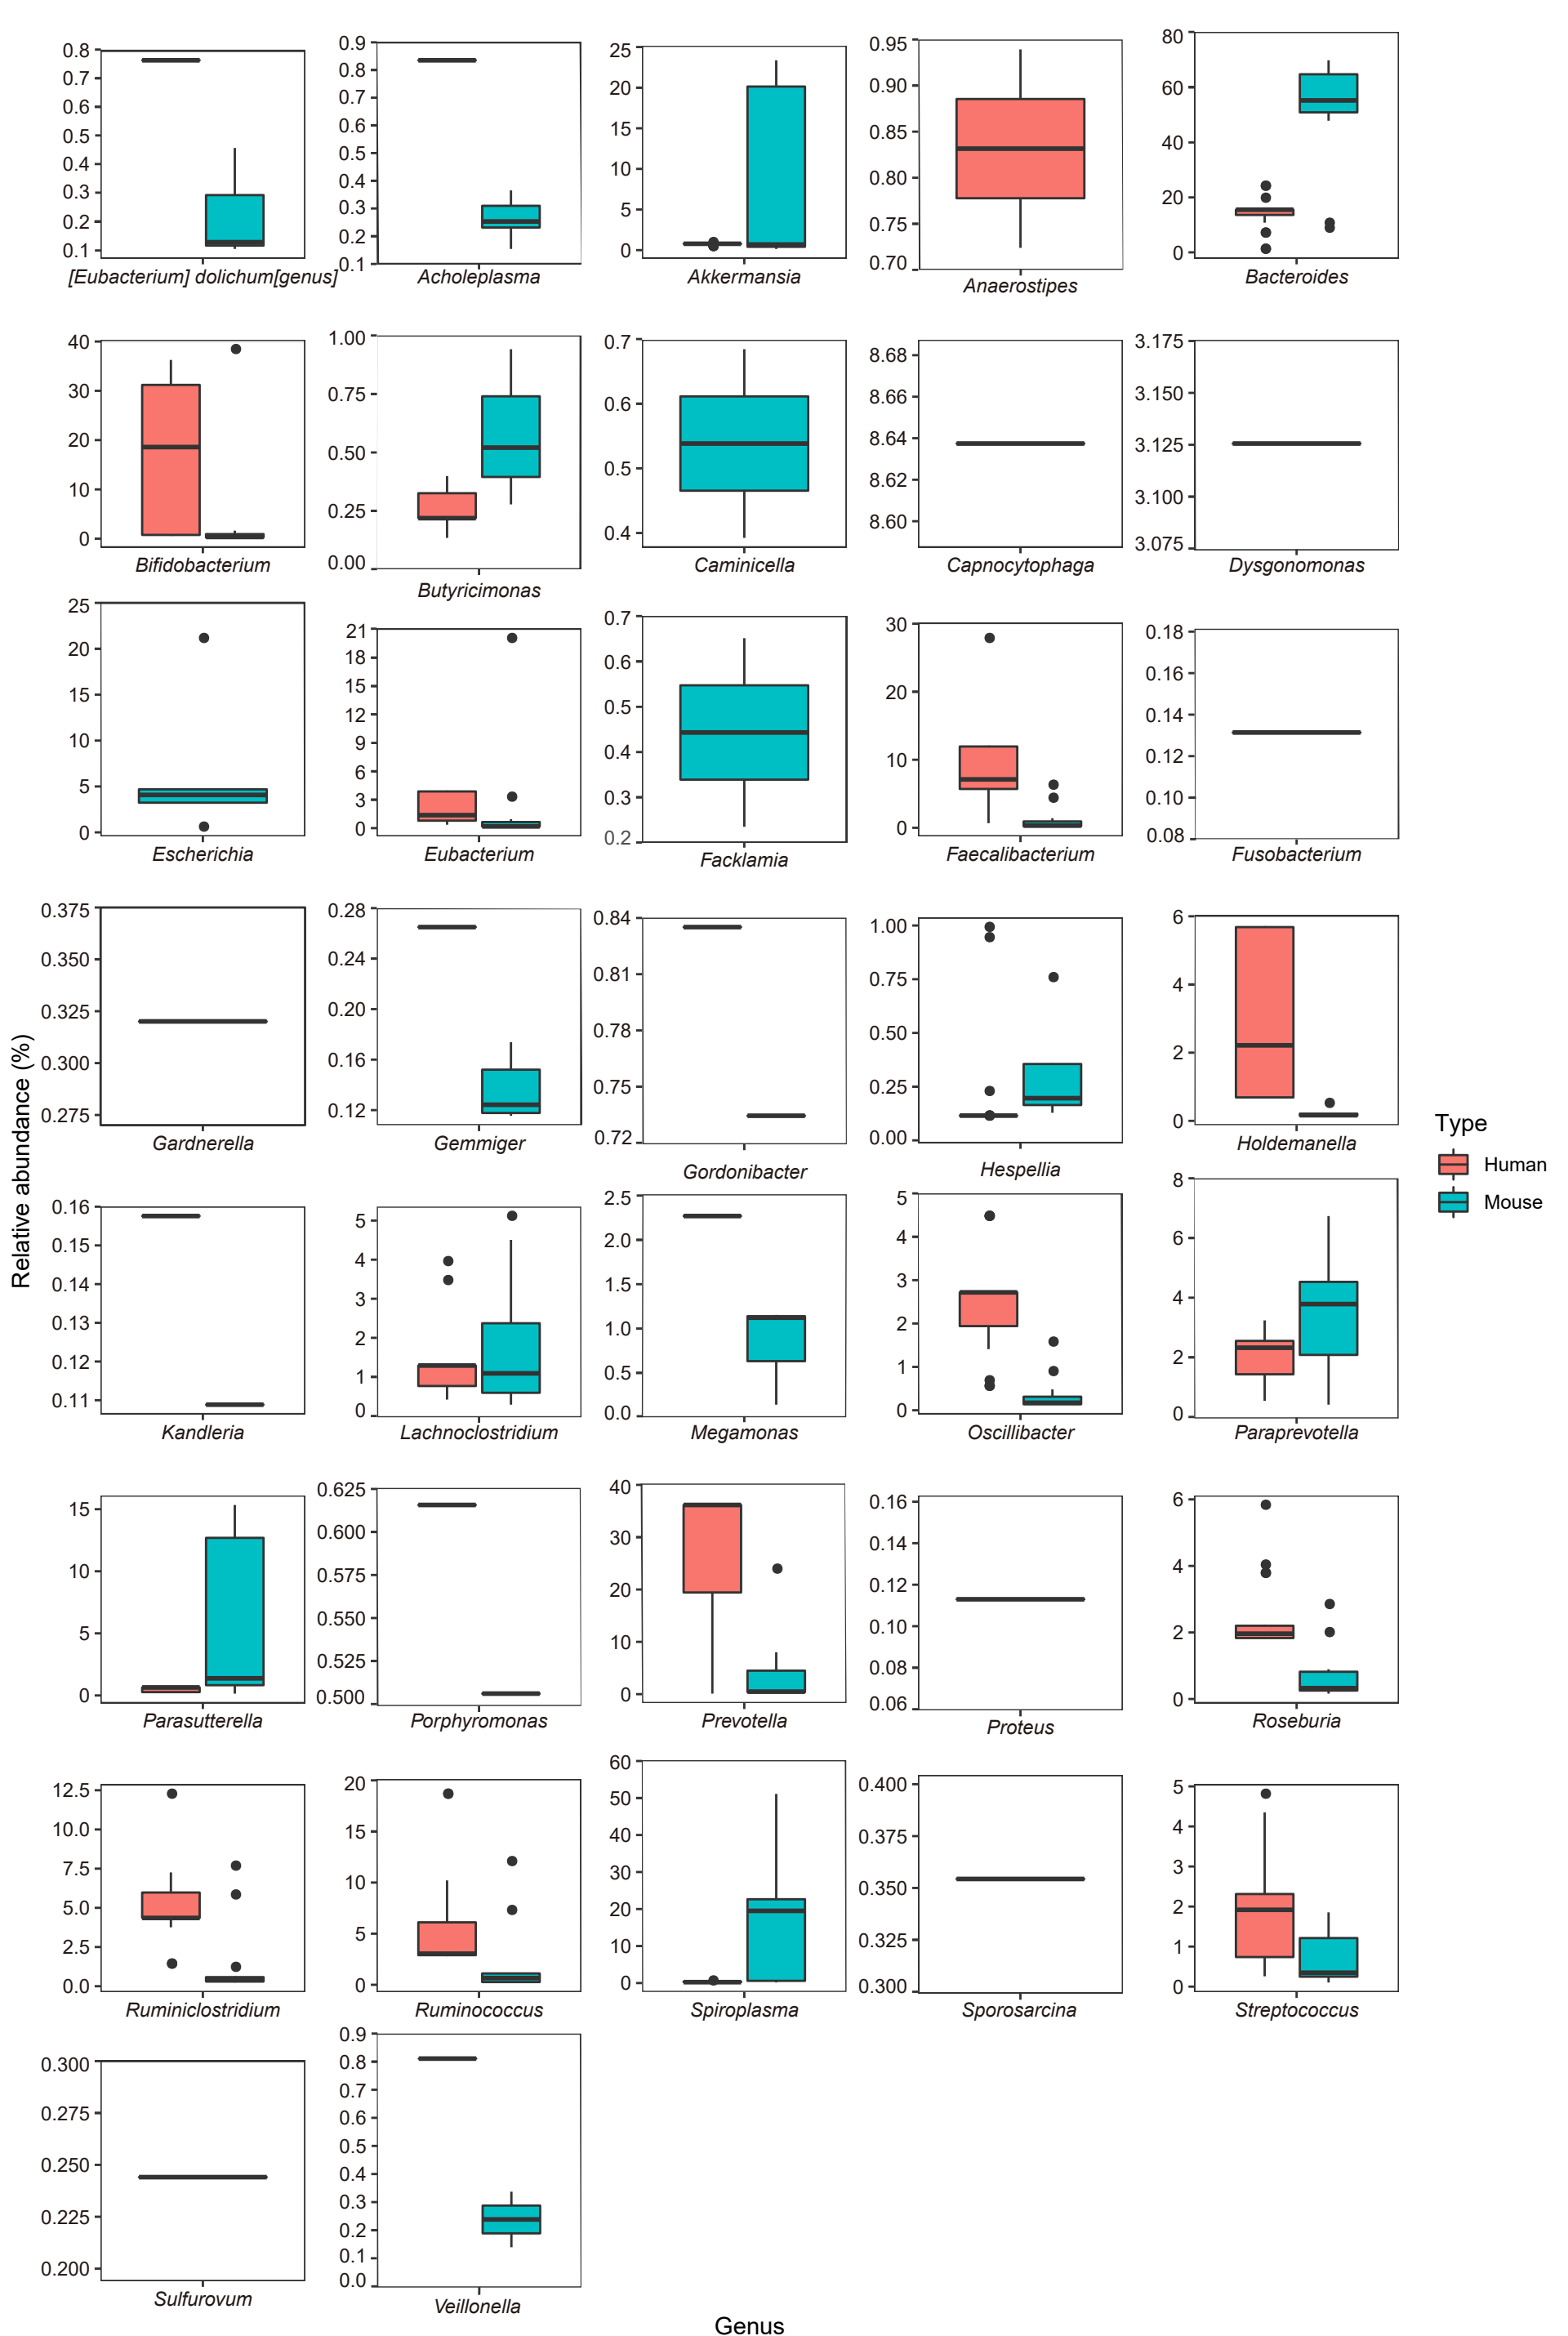

Supplement: mmc7.pdf [file mmc7.pdf]
